# Supplementary material for: Ultra-low thermal conductivity and promising thermoelectric performance in the structurally complex Zintl phase: Eu 14 GaAs 11
Source: Royal Society of Chemistry journal article supplement (doi:10.1039/d5ta09465h), 2026-01-01
Supplement: d5ta09465h1.pdf [file d5ta09465h1.pdf]

# Ultra-Low Thermal Conductivity and Promising Thermoelectric Performance in the Structurally Complex Zintl Phase: $\text{Eu}_{14}\text{GaAs}_{11}$

Md. Minhajul Islam,<sup>1</sup> Maria Wróblewska,<sup>2</sup> Yixuan Xu,<sup>1</sup> Eric S. Toberer,<sup>2</sup> and Susan M. Kauzlarich<sup>1\*</sup>

<sup>1</sup>Department of Chemistry, University of California, One Shields Ave, Davis, CA 95616, United States

<sup>2</sup>Department of Physics, Colorado School of Mines, 1500 Illinois St, Golden, CO 80401, United States

\*Corresponding author: smkauzlarich@ucdavis.edu

**Table S1.** Crystallographic Sites, Fractions, and Multiplicity Determined through Rietveld Refinement of X-ray Powder Diffraction<sup>‡</sup>

| Name | Type | <i>x</i>     | <i>y</i>     | <i>z</i>    | Frac | Uiso   | Multiplicity |
|------|------|--------------|--------------|-------------|------|--------|--------------|
| As1  | As   | 0.1335(4)    | 0.3835(4)    | 0.12500     | 1    | 0.0085 | 16           |
| As2  | As   | 0.0035(4)    | 0.1166(5)    | 0.81054(24) | 1    | 0.0088 | 32           |
| As3  | As   | 0.8700(4)    | 0.9745(4)    | 0.95306(28) | 1    | 0.0103 | 32           |
| As4  | As   | 0.0077(15)   | 0.2577(15)   | 0.12500     | 0.5  | 0.017  | 16           |
| Ga1  | Ga   | 0.00000      | 0.25000      | 0.87500     | 1    | 0.0081 | 8            |
| Eu1  | Eu   | -0.04406(23) | -0.07193(24) | 0.82889(18) | 1    | 0.0089 | 32           |
| Eu2  | Eu   | -0.02207(21) | 0.12327(26)  | 0.00287(18) | 1    | 0.0111 | 32           |
| Eu3  | Eu   | 0.3540(3)    | 0.00000      | 0.25000     | 1    | 0.0079 | 16           |
| Eu4  | Eu   | 0.18009(21)  | 0.40577(26)  | 0.84381(19) | 1    | 0.011  | 32           |

<sup>‡</sup>It is important to acknowledge that a degree of uncertainty is inherent in these values due to the complex nature of the polycrystalline sample's structure.

**Table S2.** Chemical Analysis from Energy Dispersive Spectroscopy (EDS)<sup>‡</sup>

| Eu nominal % | Eu at.% from EDS | Ga nominal % | Ga at.% from EDS | As nominal % | As at.% from EDS |
|--------------|------------------|--------------|------------------|--------------|------------------|
| 53.85        | 50.91(2)         | 3.85         | 2.49(2)          | 42.31        | 46.63(2)         |

<sup>‡</sup>Based on 10 data points of a  $\text{Eu}_{14}\text{GaAs}_{11}$  pellet with an FEI Scios DualBeam FIB/SEM instrument equipped with an Oxford Instruments X-Max 50 mm<sup>2</sup> Si drift detector.

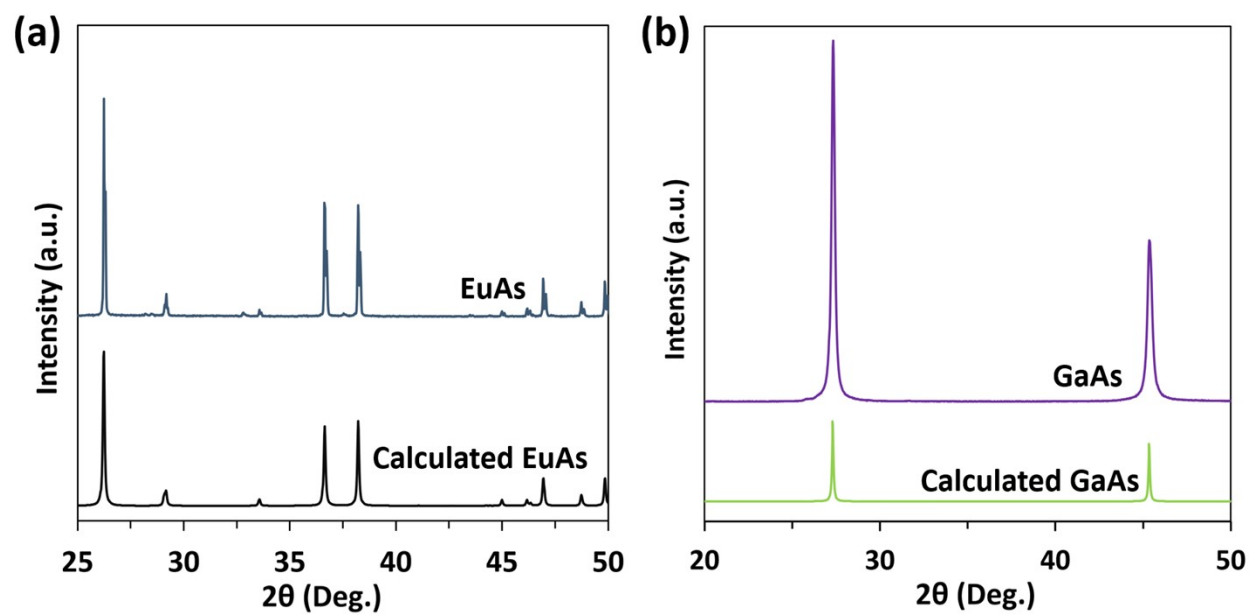

**Fig. S1.** PXRD patterns of binary precursors compared to calculated patterns of (a) EuAs, and (b) GaAs.
